# Supplementary material
Source: PubMed Central journal article supplement (PMC2896877)
Supplement: NIHMS198671-supplement-01.pdf [file NIHMS198671-supplement-01.pdf]

## ONLINE SUPPLEMENT

### ENDOTHELIAL DYSFUNCTION AND THE RISK OF HYPERTENSION: THE MULTI-ETHNIC STUDY OF ATHEROSCLEROSIS

**Short Title: Endothelial Dysfunction and Incident Hypertension**

**Authors:** Daichi Shimbo<sup>1</sup>, Paul Muntner<sup>2</sup>, Devin Mann<sup>3</sup>, Anthony J. Viera<sup>4</sup>, Shunichi Homma<sup>1</sup>, Joseph F. Polak<sup>5</sup>, R. Graham Barr<sup>1</sup>, David Herrington<sup>6</sup>, Steven Shea<sup>1,7</sup>

<sup>1</sup>Department of Medicine, Columbia University Medical Center, New York, NY

<sup>2</sup>Department of Epidemiology, University of Alabama at Birmingham, Birmingham, AL

<sup>3</sup>Department of Medicine, Mount Sinai School of Medicine, New York, NY

<sup>4</sup>Department of Family Medicine, University of North Carolina at Chapel Hill, Chapel Hill, NC

<sup>5</sup>Department of Radiology, Tufts University School of Medicine, Boston, MA

<sup>6</sup>Department of Internal Medicine, Wake Forest University School of Medicine, Winston-Salem, NC

<sup>7</sup>Department of Epidemiology, Columbia University Medical Center, New York, NY

**Corresponding Author:**

Daichi Shimbo, MD

Columbia University Medical Center

622 West 168<sup>th</sup> Street, PH 9-949

New York, NY 10032

(212) 342-4490

Fax: (646) 304-7003

Email: [ds2231@columbia.edu](mailto:ds2231@columbia.edu)

**Table S1. Relative Risk for Incident Hypertension for Covariables in the Multivariable Adjusted Models\***

| <b>Characteristics</b>                                                     | <b>Model 1<br/>RR (95% CI)</b> | <b>Model 2<br/>RR (95% CI)</b> | <b>Model 3<br/>RR (95% CI)</b> |
|----------------------------------------------------------------------------|--------------------------------|--------------------------------|--------------------------------|
| Age, per 5 year increase                                                   | 1.19 (1.15 – 1.23)             | 1.21 (1.16 – 1.26)             | 1.13 (1.08 – 1.17)             |
| Gender, male vs. female                                                    | 1.01 (0.88 – 1.14)             | 1.04 (0.89 – 1.20)             | 1.20 (1.02 – 1.41)             |
| Race, versus White                                                         |                                |                                |                                |
| African American                                                           | 1.49 (1.25 – 1.78)             | 1.31 (1.08 – 1.59)             | 1.12 (0.93 – 1.36)             |
| Hispanic                                                                   | 1.17 (0.98 – 1.39)             | 1.03 (0.85 – 1.25)             | 0.99 (0.81 – 1.21)             |
| Chinese American                                                           | 0.89 (0.70 – 1.12)             | 1.03 (0.80 – 1.33)             | 0.91 (0.71 – 1.17)             |
| BMI, per 5 kg/m <sup>2</sup> increase                                      | -                              | 1.21 (1.13 – 1.30)             | 1.10 (1.02 – 1.19)             |
| Diabetes, yes vs. no                                                       | -                              | 1.73 (1.40 – 2.12)             | 1.62 (1.32 – 2.00)             |
| LDL-cholesterol, per 40 mg/dL increase                                     | -                              | 0.94 (0.86 – 1.02)             | 0.93 (0.85 – 1.02)             |
| HDL-cholesterol, per 40 mg/dL increase                                     | -                              | 1.05 (0.95 – 1.16)             | 1.01 (0.91 – 1.12)             |
| Current smoking, yes vs. no                                                | -                              | 1.19 (0.99 – 1.42)             | 1.18 (0.98 – 1.41)             |
| Current alcohol intake, yes vs. no                                         | -                              | 1.07 (0.92 – 1.23)             | 1.07 (0.93 – 1.24)             |
| High school education, yes vs. no                                          | -                              | 0.93 (0.77 – 1.12)             | 1.06 (0.87 – 1.28)             |
| Physical activity level in 1000 METs<br>-min/wk, per two-fold higher level | -                              | 0.99 (0.91 – 1.06)             | 1.07 (0.93 – 1.24)             |
| eGFR, per 20 ml/min/1.73m <sup>2</sup> decrease                            | -                              | 1.04 (0.94 – 1.14)             | 1.05 (0.96 – 1.16)             |
| CRP, per two-fold higher level                                             | -                              | 1.05 (1.00 – 1.09)             | 1.02 (0.98 – 1.07)             |
| SBP, per 10 mmHg increase                                                  | -                              | -                              | 1.63 (1.52 – 1.74)             |
| DBP, per 5 mmHg increase                                                   | -                              | -                              | 1.06 (1.00 – 1.12)             |

\*Models also included adjustment for flow-mediated dilation and MESA site.

BMI = body mass index, CI = confidence interval, CRP = C-reactive protein, DBP = diastolic blood pressure, eGFR = estimated glomerular filtration rate, HDL = high-density lipoprotein, LDL = low-density lipoprotein, MET = metabolic equivalent value, RR = relative risk, SBP = systolic blood pressure.
